# Supplementary material for: Acquired Generalized Lipodystrophy: A New Cause of Anti-PD-1 Immune-Related Diabetes
Source: Oxford University Press journal article supplement (doi:10.2337/dc18-2535), 2019-08-21
Supplement: dc182535supplementarydata.pdf [file dc182535supplementarydata.pdf]

SUPPLEMENTARY DATA

**Supplementary Table S1.** Clinical and biological parameters before and after nivolumab initiation.

|                                       | Before<br>nivolumab initiation | After 21 months |
|---------------------------------------|--------------------------------|-----------------|
| Weight (kg)                           | 51                             | 46.9            |
| Body Mass Index (kg/m <sup>2</sup> )  | 18.1                           | 16.8            |
| Glycemia (mmol/L), NR : 4.4-6.4       | 5.5                            | 24.9            |
| HbA1c (% / mmol/mol), NR<6.5 / 47.5   | 6.0 / 42.1                     | 11.4 / 101      |
| Total Cholesterol (mmol/L), NR: 3.5-7 | 7.4                            | 6.3             |
| Triglycerides (mmol/L), NR: 0.4-1.7   | 0.79                           | 6.4             |
| HDL-C (mmol/L), NR >1.3               | 2.8                            | 0.95            |
| LDL-C (mmol/L), NR: 1.9-4.1           | 4.1                            | 3.5             |
| ASAT (Ui/L), NR : 0-34                | 25                             | 158             |
| ALAT (Ui/L), NR : 0-55                | 11                             | 91              |
| GGT (Ui/L), NR : 9-36                 | 14                             | 46              |
| Insulin (mUi/L)                       | 5.9                            | 40              |
| C-Peptide (nmol/L), NR: 0.37-1.47     | 0.62                           | 2.3             |
| HOMA-IR, NR<3                         | 1.44                           | 44.3            |
| TyG Index (NR<4.49)                   | 4.36                           | 6.19            |
| Leptin (ng/mL)                        | 3.62                           | <1              |
| Adiponectin (ug/mL), NR: 0.86-21.4    | 19.5                           | 0.84            |

HbA1c= Hemoglobin A1C, HDL-C= High Density Lipoprotein cholesterol, LDL-C= Low density lipoprotein cholesterol, ASAT= Aspartate aminotransferase, ALAT= Alanine aminotransferase, GGT= Gamma-Glutamyl-Transpeptidase, HOMA-IR= Homeostasis Model Assessment of Insulin Resistance, TyG = Triglyceride-glucose index (Log [fasting triglycerides (mg/dl) × fasting glucose (mg/dl)/2])  
Nivolumab was discontinued after 18 months of therapy.

SUPPLEMENTARY DATA

**Supplementary Figure S1.** Contrast-enhanced abdominal CT at the level of liver segment VIII, with measurement of liver, spleen and muscle radiodensity, showing the appearance of a severe liver steatosis under nivolumab therapy.

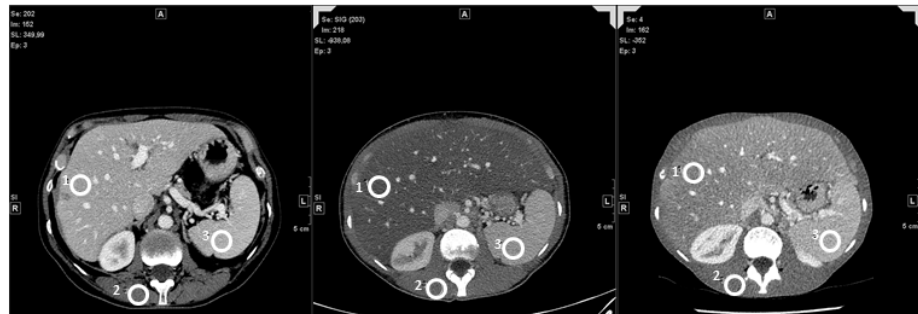

4 months before nivolumab initiation

18 months after nivolumab initiation

7 months after nivolumab discontinuation and 3 months after initiation of insulin therapy

|                               |       |       |      |
|-------------------------------|-------|-------|------|
| Mean liver radiodensity (UH)  | 125.3 | 40.3  | 93.9 |
| Mean muscle radiodensity (UH) | 63.9  | 61    | 70.4 |
| Mean spleen radiodensity (UH) | 139.3 | 108.2 | 136  |
| Liver-to- Muscle Ratio (LMR)  | 1.96  | 0.66  | 1.33 |
